# Supplementary material for: Preparation of structurally colored films assembled by using polystyrene@silica, air@silica and air@carbon@silica core–shell nanoparticles with enhanced color visibility
Source: Royal Society of Chemistry journal article supplement (doi:10.1039/c5ra25680a), 2016-01-01
Supplement: c5ra25680a1.pdf [file c5ra25680a1.pdf]

## **Supporting information**

### **Preparation of structurally colored films assembled by Polystyrene@Silica, air@Silica and air@Carbon@Silica core-shell nanoparticles with enhanced color visibility**

Fen Wang, Xin Zhang, Jianfeng Zhu and Ying Lin

*School of Materials Science and Engineering, Shaanxi University of Science and  
Technology, Xi'an 710021, China*

Corresponding author: Fen Wang

Tel.: +8615114805183;

fax: +8602986168688.

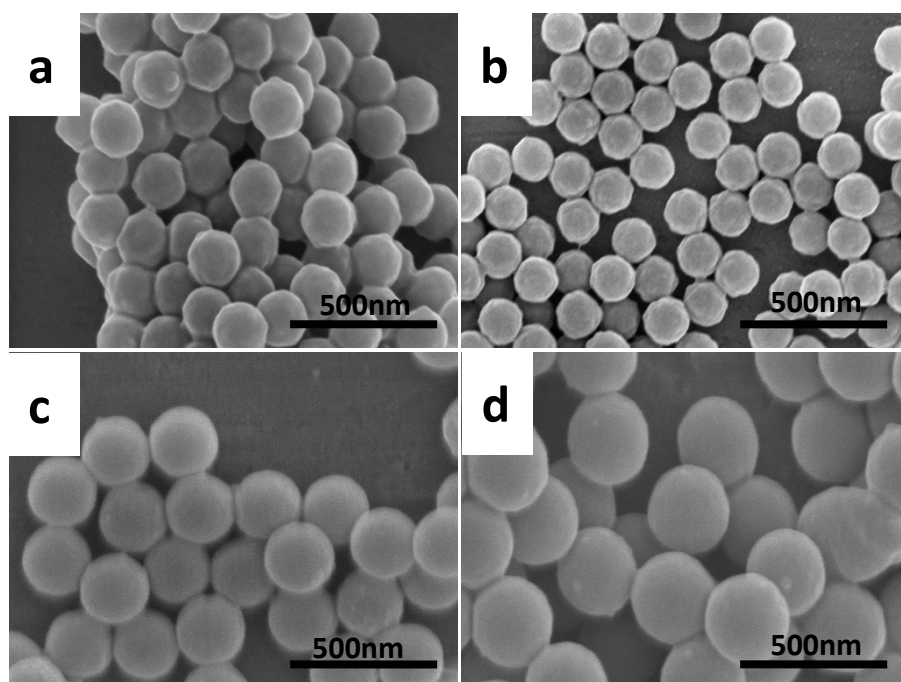

Figure S1. PS spheres of different size with a low polydispersity have been prepared by the emulsifier-free emulsion polymerization method: a)  $180\pm 5$  nm, b)  $200\pm 5$  nm, c)  $240\pm 5$  nm, and d)  $290\pm 5$  nm

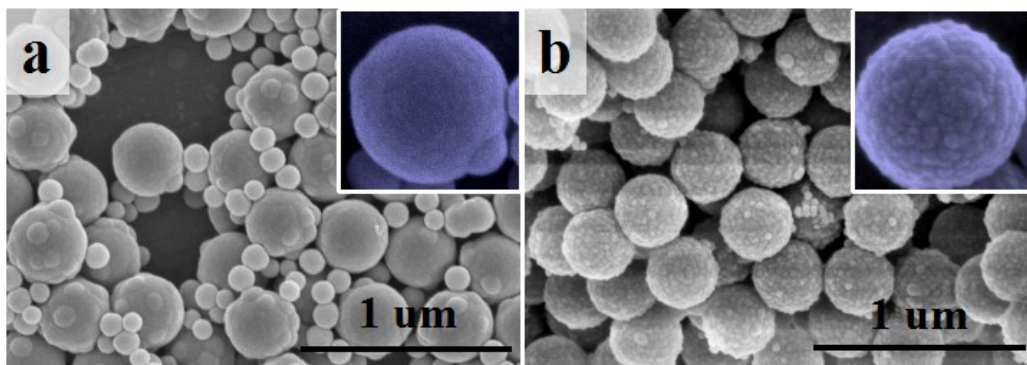

Fig. S2 (a) SiO<sub>2</sub> coated PS (PS was used without modification) (b) SiO<sub>2</sub> coated PS (PS was modified by NH<sub>3</sub>·H<sub>2</sub>O); inserts in (a) - (b) are high-magnification SEM images.

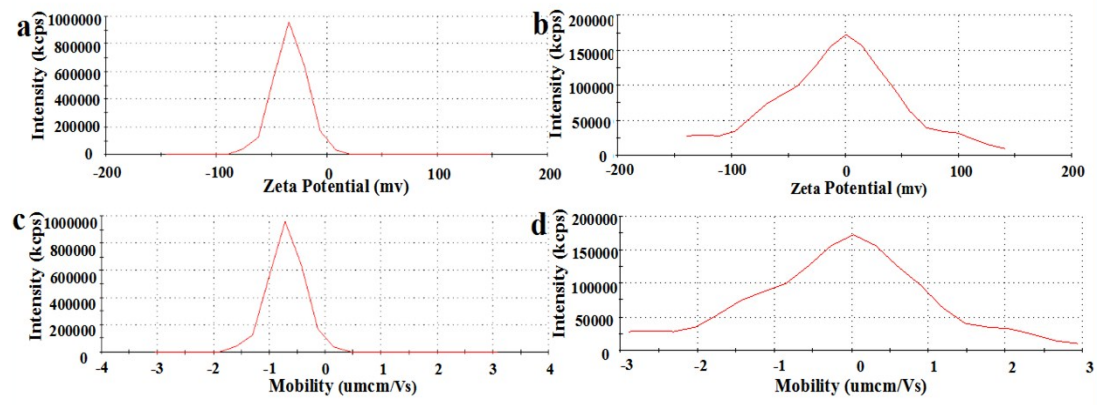

**Fig. S3** Electrophoretic measurements on PS colloids: zeta potential for bare (a) and ammonium hydroxide modified (b) PS colloids; electrophoretic mobility of bare (c) and ammonium hydroxide modified PS (d) colloids.

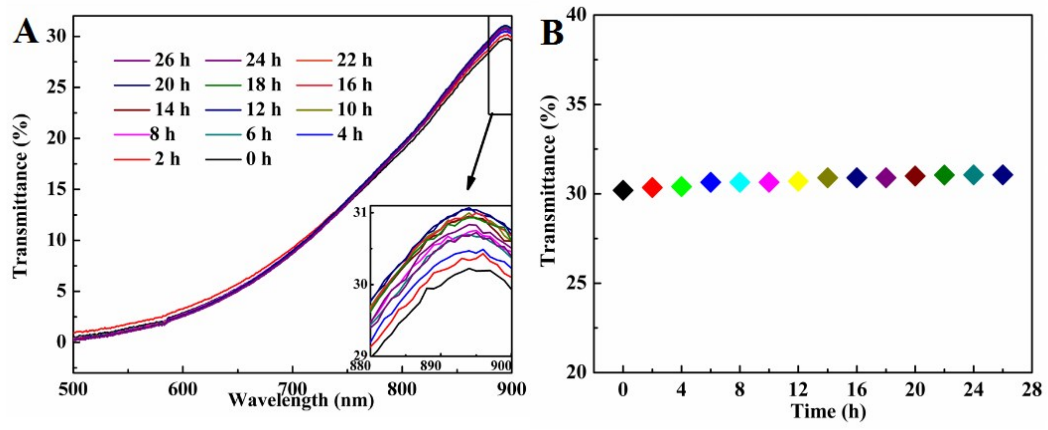

Fig. S4 Transmittance changes of the PS@SiO<sub>2</sub> solution over times.

Table S2. the size, and shell thickness of the core-shell particles before and after calcination

| sample | Core<br>particle | C <sub>TEOS</sub><br>(uL) | D <sub>PS@SiO<sub>2</sub></sub><br>(nm) | D <sub>Air@SiO<sub>2</sub></sub><br>(nm) | Shell thickness<br>(nm) | Ref peak(nm) |
|--------|------------------|---------------------------|-----------------------------------------|------------------------------------------|-------------------------|--------------|
| PS180  | 180±5            | 100                       | 220 ± 5                                 | 210± 5                                   | 15                      | 387          |
| PS200  | 200±5            | 150                       | 250 ± 5                                 | 240± 5                                   | 20                      | 448          |
| PS240  | 240±5            | 200                       | 300 ± 5                                 | 290± 5                                   | 25                      | 545          |
| PS290  | 290±5            | 200                       | 340 ± 5                                 | 330± 5                                   | 20                      | 599          |
